# Supplementary material
Source: HighWire-hosted journal article supplement (https://www.cmaj.ca/highwire/filestream/59143/field_highwire_adjunct_files/0/disability-reaume-1-at_final.pdf)
Supplement: disability-reaume-1-at_final.pdf [file disability-reaume-1-at_final.pdf]

## Appendix 1: Further reading on disability

- *Defining impairment and disability*. Leeds (UK): Northern Officer Group; 1996. Available: <http://www.leeds.ac.uk/disability-studies/archiveuk/Northern%20Officers%20Group/defining%20impairment%20and%20disability.pdf>
- LeFrancois B, Menzies R, Reaume G, co-editors. *Mad matters: a critical reader in Canadian mad studies*. Toronto: Canadian Scholars Press; 2013.
- Meekosha H. Decolonising disability: Thinking and acting globally. *Disability & Society* 2011;26:667–82.
- Oliver M. *The Politics of disablement: a sociological approach*. New York: St. Martin's Press, 1990.
- Pothier D, Devlin R, editors. *Critical disability theory: essays in philosophy, politics, policy and law*. Vancouver: University of British Columbia Press; 2006.
- Rioux M, Bach M, editors. *Disability is not measles: new research paradigms in disability*. North York (ON): Roeher Institute; 1994.
- Russell M. *Beyond ramps: Disability at the end of the social contract: a warning from an uppity crip*. Monroe (ME): Common Courage Press; 1998.
- Scotch, RK. Medical model of disability, In: Burch Susan, editor. *Encyclopedia of American disability history*. New York: Facts on File; 603-604.
- Shakespeare T, Bickenbach J, Pfeiffer D, et al. Models In: Albrecht G, editor. *Encyclopedia of disability: Volume 2*. Thousand Oaks (CA): Sage; 2006:1101–8.
- Shakespeare T. *Disability rights and wrongs*. London (UK): Routledge; 2006.
- Sheldon A, Traustadottir R, Beresford P, et al. Disability rights and wrongs? *Disability and society*; 2007;22:209–34.
- Taylor SJ. Disability studies. In: Burch S, editor. *Encyclopedia of American disability history: Volume 1*. New York: Facts on File; 2009:286–87.
- Titchkosky T, Michalko R, editors. *Rethinking normalcy: a disability studies reader*. Toronto: Canadian Scholars' Press; 2009.
- Withers AJ. *Disability politics & theory*. Halifax: Fernwood Press; 2012
